# Supplementary material for: African-American esophageal squamous cell carcinoma expression profile reveals dysregulation of stress response and detox networks
Source: BMC Cancer. 2017 Jun 19;17:426. doi: 10.1186/s12885-017-3423-1 (PMC5477112; doi:10.1186/s12885-017-3423-1)
Supplement: Supplementary file 1 — The list of the demographics and risk factors of the patients. (XLSX 9 kb) [file 12885_2017_3423_MOESM1_ESM.xlsx]

## Sheet: Sheet1
Case ID	Age	Gender	Race	Risk Factors
1	63	male	African-American	smoking, alcohol consumption
2	57	male	African-American	smoking, alcohol consumption
3	62	male	African-American	smoking
4	77	male	African-American	smoking, alcohol consumption
5	69	male	African-American	smoking, alcohol consumption
6	68	male	African-American	smoking
7	64	male	African-American	alcohol consumption
