# Supplementary material for: African-American esophageal squamous cell carcinoma expression profile reveals dysregulation of stress response and detox networks
Source: BMC Cancer. 2017 Jun 19;17:426. doi: 10.1186/s12885-017-3423-1 (PMC5477112; doi:10.1186/s12885-017-3423-1)
Supplement: Supplementary file 3 — The characteristics of studies included in Meta-analysis. (XLSX 11 kb) [file 12885_2017_3423_MOESM3_ESM.xlsx]

## Sheet: Sheet1
	Accession number	Description of study	Tissue storage (Fresh frozen or FFPE)	Control Tissue type	Sample size (n)	Microarray method	Reference
	GSE17351	Primary tumor tissues (ESCC) and matched normal tissues (adjacent normal esophageal mucosa)	No information	Matched non-cancerous esophageal	5	Affymetrix Human Genome U133 Plus 2.0 Array	25
	GSE20347	Examined gene expression in tumor and matched normal adjacent tissue from 17 ESCC patients from a high-risk region of China	Fresh frozen	Matched non-cancerous esophageal	17	Affymetrix Human Genome U133A 2.0 array	26
	GSE23400	To better characterize molecular changes in ESCC, we followed up a previous cDNA array study with additional discovery and confirmatory studies in new ESCC cases using alternative methods.	Fresh frozen	Matched non-cancerous esophageal	53	Affymetrix U133A/B chip	27
	GSE29001	Gene expression profiles in twelve cases of patient-matched normal basal epithelial cells, normal differentiated squamous epithelium, and cancer.	Fresh frozen	Matched non-cancerous esophageal	12	Affymetrix Human Genome U133A 2.0 Array	28
	GSE33426	Microdissected discrete sub-regions of esophageal squamous cell carcinoma (ESCC) and analyzed the transcriptomes throughout three-dimensional (3D) tumor space	Fresh frozen	Matched non-cancerous esophageal	14	Affymetrix Human Genome U133A 2.0 Array	28
	GSE33810	Pooled RNA from 10 pairs of primary ESCCs without family history and 5 pairs with family history, relative to their corresponding non-tumor tissues	No information	Matched non-cancerous esophageal	15	Affymetrix Human Genome U133 Plus 2.0 Array	29
	GSE45670	Gene expression analyses were performed on pretreatment cancer biopsies from 28 ESCCs who received neoadjuvant CRT and surgery and 10 normal esophageal epithelia	Fresh frozen	Matched non-cancerous esophageal	10	Affymetrix U133 Plus 2.0 arrays.	30
